# Supplementary material
Source: publisher site journal article supplement (https://www.dovepress.com/article/569639)
Supplement: Supplementary file 1 [file 569639%20Supplementary%20Material.docx]

**Supplementary Table**

**Supplementary Table S1.** Aortic dissection (AD) mortality characteristics in the United States in 1999 and 2023, stratified by region, sex, race, urbanization level, and age group.

| **Classification** | **variable** | **Year** | **Deaths** | **AAMR** | **lower** | **upper** | **se** |
| --- | --- | --- | --- | --- | --- | --- | --- |
| Urbanization | Nonmetropolitan | 1999 | 594 | 1.86 | 1.71 | 2.01 | 0.08 |
| Urbanization | Metropolitan | 1999 | 2752 | 1.90 | 1.83 | 1.97 | 0.04 |
| Sex | Male | 1999 | 1950 | 2.53 | 2.41 | 2.64 | 0.06 |
| Sex | Male | 2023 | 2586 | 2.19 | 2.10 | 2.27 | 0.04 |
| Sex | Female | 1999 | 1396 | 1.36 | 1.28 | 1.43 | 0.04 |
| Sex | Female | 2023 | 1832 | 1.24 | 1.19 | 1.30 | 0.03 |
| Sex | Both | 1999 | 3346 | 1.89 | 1.82 | 1.95 | 0.03 |
| Sex | Both | 2023 | 4418 | 1.73 | 1.68 | 1.78 | 0.03 |
| Race | NH White | 1999 | 2701 | 1.87 | 1.80 | 1.95 | 0.04 |
| Race | NH White | 2023 | 3107 | 1.71 | 1.65 | 1.77 | 0.03 |
| Race | NH Other | 1999 | 85 | 1.57 | 1.24 | 1.97 | 0.18 |
| Race | NH Other | 2023 | 238 | 1.25 | 1.09 | 1.41 | 0.08 |
| Race | NH Black | 1999 | 424 | 2.48 | 2.24 | 2.72 | 0.12 |
| Race | NH Black | 2023 | 750 | 2.75 | 2.55 | 2.96 | 0.10 |
| Race | Hispace | 1999 | 128 | 1.19 | 0.97 | 1.41 | 0.11 |
| Race | Hispace | 2023 | 311 | 0.93 | 0.83 | 1.04 | 0.06 |
| Census Region | West | 1999 | 699 | 1.93 | 1.79 | 2.07 | 0.07 |
| Census Region | West | 2023 | 1017 | 1.71 | 1.60 | 1.82 | 0.05 |
| Census Region | South | 1999 | 1077 | 1.74 | 1.64 | 1.84 | 0.05 |
| Census Region | South | 2023 | 1636 | 1.66 | 1.58 | 1.75 | 0.04 |
| Census Region | Northeast | 1999 | 661 | 1.81 | 1.67 | 1.94 | 0.07 |
| Census Region | Northeast | 2023 | 711 | 1.52 | 1.40 | 1.64 | 0.06 |
| Census Region | Midwest | 1999 | 909 | 2.17 | 2.03 | 2.31 | 0.07 |
| Census Region | Midwest | 2023 | 1054 | 1.96 | 1.84 | 2.08 | 0.06 |
| Age Group | 85+ years | 1999 | 400 | 9.63 | 8.69 | 10.57 | 0.48 |
| Age Group | 85+ years | 2023 | 723 | 11.67 | 10.82 | 12.52 | 0.43 |
| Age Group | 75-84 years | 1999 | 902 | 7.38 | 6.90 | 7.86 | 0.25 |
| Age Group | 75-84 years | 2023 | 978 | 5.32 | 4.99 | 5.66 | 0.17 |
| Age Group | 65-74 years | 1999 | 768 | 4.17 | 3.87 | 4.46 | 0.15 |
| Age Group | 65-74 years | 2023 | 862 | 2.49 | 2.32 | 2.65 | 0.08 |
| Age Group | 55-64 years | 1999 | 534 | 2.25 | 2.06 | 2.44 | 0.10 |
| Age Group | 55-64 years | 2023 | 826 | 1.97 | 1.84 | 2.11 | 0.07 |
| Age Group | 45-54 years | 1999 | 425 | 1.16 | 1.05 | 1.27 | 0.06 |
| Age Group | 45-54 years | 2023 | 590 | 1.46 | 1.34 | 1.57 | 0.06 |
| Age Group | 35-44 years | 1999 | 247 | 0.55 | 0.48 | 0.62 | 0.03 |
| Age Group | 35-44 years | 2023 | 336 | 0.76 | 0.68 | 0.84 | 0.04 |
| Age Group | 25-34 years | 1999 | 70 | 0.17 | 0.14 | 0.22 | 0.02 |
| Age Group | 25-34 years | 2023 | 103 | 0.23 | 0.18 | 0.27 | 0.02 |

**Supplementary Table S2.** Average annual percent change (AAPC) in aortic dissection (AD) mortality rates in the United States, 1999–2023, stratified by region, sex, race, urbanization level, and age group.

| **Classification** | **variable** | **AAPC** | **lower** | **upper** | **P** |
| --- | --- | --- | --- | --- | --- |
| Urbanization | Nonmetropolitan | -0.376 | -0.8262 | 0.2513 | 0.19876 |
| Urbanization | Metropolitan | -1.1211 | -1.4645 | -0.6308 | 0 |
| Sex | Male | -1.0293 | -1.3754 | -0.6807 | 0 |
| Sex | Female | -0.3727 | -0.6564 | 0.0398 | 0.069586 |
| Sex | Both | -0.5539 | -0.8157 | -0.1917 | 0.009998 |
| Race | NH White | -0.5267 | -0.7424 | -0.264 | 4e-04 |
| Race | NH Other | -1.9387 | -2.9457 | -0.6726 | 0.017596 |
| Race | NH Black | 0.2853 | -0.122 | 0.8198 | 0.15037 |
| Race | Hispace | -1.4177 | -2.0481 | -0.7542 | 0 |
| Census Region | West | -1.0316 | -1.5519 | -0.512 | 4e-04 |
| Census Region | South | -0.1695 | -0.586 | 0.4643 | 0.434713 |
| Census Region | Northeast | -0.7085 | -1.0196 | -0.2954 | 0.003599 |
| Census Region | Midwest | -0.4721 | -0.8633 | -0.0756 | 0.019196 |
| Age Group | 85+ years | 0.0624 | -0.6794 | 0.8518 | 0.837832 |
| Age Group | 75-84 years | -1.6791 | -2.0315 | -1.2099 | 0 |
| Age Group | 65-74 years | -2.3314 | -2.9827 | -1.6522 | 0 |
| Age Group | 55-64 years | -0.7769 | -1.2836 | -0.2486 | 0.004799 |
| Age Group | 45-54 years | 0.9475 | 0.5457 | 1.4383 | 8e-04 |
| Age Group | 35-44 years | 1.4379 | 0.8929 | 2.0336 | 0 |
| Age Group | 25-34 years | 0.429 | -0.151 | 1.0289 | 0.14917 |

**Supplementary Table S3.** Annual percent change (APC) in aortic dissection (AD) mortality rates in the United States, 1999–2023, stratified by U.S. Census region, sex, race, urbanization level, and age group.

| **Classification** | **variable** | **Start** | **End** | **APC** | **lower** | **upper** | **P** |
| --- | --- | --- | --- | --- | --- | --- | --- |
| Urbanization | Nonmetropolitan | 1999 | 2006 | -0.2313 | -1.8218 | 4.3352 | 0.952609 |
| Urbanization | Nonmetropolitan | 2006 | 2010 | -7.4392 | -11.975 | -3.2887 | 0.024795 |
| Urbanization | Nonmetropolitan | 2010 | 2020 | 2.4938 | 1.1764 | 4.6696 | 0.017596 |
| Urbanization | Metropolitan | 1999 | 2006 | -1.2598 | -2.5462 | 2.4675 | 0.257948 |
| Urbanization | Metropolitan | 2006 | 2010 | -7.0947 | -10.7797 | -3.7682 | 0.019596 |
| Urbanization | Metropolitan | 2010 | 2020 | 1.4742 | 0.5206 | 2.9639 | 0.015597 |
| Sex | Male | 1999 | 2012 | -3.4076 | -4.4103 | -2.6646 | 0 |
| Sex | Male | 2012 | 2023 | 1.8571 | 0.926 | 3.1869 | 0 |
| Sex | Female | 1999 | 2006 | -1.0833 | -2.4226 | 2.268 | 0.264747 |
| Sex | Female | 2006 | 2011 | -6.0584 | -10.7346 | -3.3779 | 0.036793 |
| Sex | Female | 2011 | 2023 | 2.524 | 1.7237 | 3.5647 | 0.009598 |
| Sex | Both | 1999 | 2006 | -1.1161 | -2.2839 | 1.4529 | 0.212757 |
| Sex | Both | 2006 | 2010 | -7.4713 | -11.1767 | -4.3639 | 0.012398 |
| Sex | Both | 2010 | 2023 | 1.9876 | 1.3988 | 2.7753 | 0.005199 |
| Race | NH White | 1999 | 2006 | -1.5106 | -2.4363 | 0.4482 | 0.083983 |
| Race | NH White | 2006 | 2010 | -6.663 | -9.6239 | -4.1492 | 0.008398 |
| Race | NH White | 2010 | 2023 | 1.9857 | 1.5055 | 2.5558 | 0.003199 |
| Race | NH Other | 1999 | 2013 | -3.6349 | -12.7814 | -1.4989 | 0.042791 |
| Race | NH Other | 2013 | 2023 | 0.4863 | -1.9793 | 11.0156 | 0.556689 |
| Race | NH Black | 1999 | 2006 | 1.7855 | -0.0869 | 5.3952 | 0.060388 |
| Race | NH Black | 2006 | 2009 | -13.1921 | -15.9992 | -6.214 | 4e-04 |
| Race | NH Black | 2009 | 2023 | 2.6702 | 1.9694 | 3.6913 | 0 |
| Race | Hispace | 1999 | 2013 | -3.6387 | -5.9661 | -2.3477 | 0 |
| Race | Hispace | 2013 | 2023 | 1.7779 | 0.0994 | 5.1071 | 0.040392 |
| Census Region | West | 1999 | 2013 | -3.2639 | -4.8963 | -2.264 | 0 |
| Census Region | West | 2013 | 2023 | 2.1805 | 0.6114 | 4.8534 | 0.008398 |
| Census Region | South | 1999 | 2003 | 1.9616 | -1.7219 | 11.8055 | 0.283943 |
| Census Region | South | 2003 | 2012 | -4.478 | -10.1123 | -3.1454 | 0.029194 |
| Census Region | South | 2012 | 2023 | 2.7079 | 1.5333 | 4.1811 | 0.013997 |
| Census Region | Northeast | 1999 | 2006 | -0.9214 | -2.2229 | 1.9819 | 0.337932 |
| Census Region | Northeast | 2006 | 2011 | -6.6283 | -11.4731 | -4.0172 | 0.013197 |
| Census Region | Northeast | 2011 | 2023 | 1.9952 | 1.1417 | 3.1275 | 0.008798 |
| Census Region | Midwest | 1999 | 2011 | -2.8958 | -4.2654 | -1.9671 | 0 |
| Census Region | Midwest | 2011 | 2023 | 2.0122 | 1.0709 | 3.4033 | 0 |
| Age Group | 85+ years | 1999 | 2012 | -2.5855 | -6.2605 | -0.9692 | 4e-04 |
| Age Group | 85+ years | 2012 | 2023 | 3.2848 | 1.4788 | 7.7043 | 0 |
| Age Group | 75-84 years | 1999 | 2006 | -2.4536 | -4.1687 | 3.0401 | 0.09998 |
| Age Group | 75-84 years | 2006 | 2011 | -6.9818 | -11.8706 | 2.067 | 0.069186 |
| Age Group | 75-84 years | 2011 | 2023 | 1.0838 | -0.0352 | 2.544 | 0.052789 |
| Age Group | 65-74 years | 1999 | 2012 | -5.2654 | -7.9963 | -3.8529 | 0 |
| Age Group | 65-74 years | 2012 | 2023 | 1.2534 | -0.5326 | 5.076 | 0.134773 |
| Age Group | 55-64 years | 1999 | 2010 | -3.5285 | -5.7932 | -2.196 | 0 |
| Age Group | 55-64 years | 2010 | 2023 | 1.6126 | 0.6202 | 3.0992 | 4e-04 |
| Age Group | 45-54 years | 1999 | 2006 | 1.9132 | 0.1685 | 6.2324 | 0.034393 |
| Age Group | 45-54 years | 2006 | 2011 | -5.8717 | -10.9036 | -2.8186 | 0.003199 |
| Age Group | 45-54 years | 2011 | 2023 | 3.357 | 2.4549 | 4.5118 | 8e-04 |
| Age Group | 35-44 years | 1999 | 2023 | 1.4379 | 0.8929 | 2.0336 | 0 |
| Age Group | 25-34 years | 1999 | 2023 | 0.429 | -0.151 | 1.0289 | 0.14917 |

**Supplementary Table S4.** Spearman rank correlations between temperature characteristics and monthly crude mortality rates across the four United States census regions.

| **Region** | **Variable** | **n** | **r** | **p** |
| --- | --- | --- | --- | --- |
| Census Region 1: Northeast | Max Temp (°F) | 156 | -0.447670513 | 4.64373661836756e-09 |
| Census Region 1: Northeast | Mean Temp (°F) | 156 | -0.443330776 | 6.79483896868313e-09 |
| Census Region 1: Northeast | Min Temp (°F) | 156 | -0.442109273 | 7.55602221949257e-09 |
| Census Region 1: Northeast | Month-to-Month Range (°F) | 155 | -0.130995877 | 0.104227982145589 |
| Census Region 1: Northeast | Monthly Range (°F) | 156 | -0.309241851 | 8.56224694484815e-05 |
| Census Region 2: Midwest | Max Temp (°F) | 156 | -0.470580426 | 5.68565938456301e-10 |
| Census Region 2: Midwest | Mean Temp (°F) | 156 | -0.466128075 | 8.65661877736357e-10 |
| Census Region 2: Midwest | Min Temp (°F) | 156 | -0.458337219 | 1.78063980673185e-09 |
| Census Region 2: Midwest | Month-to-Month Range (°F) | 155 | -0.220686099 | 0.00579101860452011 |
| Census Region 2: Midwest | Monthly Range (°F) | 156 | -0.425799849 | 2.9982874668747e-08 |
| Census Region 3: South | Max Temp (°F) | 156 | -0.569773314 | 8.32338907926442e-15 |
| Census Region 3: South | Mean Temp (°F) | 156 | -0.547268266 | 1.44308718712685e-13 |
| Census Region 3: South | Min Temp (°F) | 156 | -0.524276832 | 2.15303333091351e-12 |
| Census Region 3: South | Month-to-Month Range (°F) | 155 | -0.262444379 | 0.000970366095955573 |
| Census Region 3: South | Monthly Range (°F) | 156 | -0.245548041 | 0.00200377189429693 |
| Census Region 4: West | Max Temp (°F) | 156 | -0.46288161 | 1.17172912992961e-09 |
| Census Region 4: West | Mean Temp (°F) | 156 | -0.452541847 | 3.00973534691149e-09 |
| Census Region 4: West | Min Temp (°F) | 156 | -0.446073361 | 5.34535496934184e-09 |
| Census Region 4: West | Month-to-Month Range (°F) | 155 | -0.234500922 | 0.00331461301200884 |
| Census Region 4: West | Monthly Range (°F) | 156 | -0.519749991 | 3.58013449425038e-12 |

**Supplementary Table S5.** Spearman rank correlations between lagged temperature and monthly crude mortality rates across the four United States census regions.

| **Region** | **Lag** | **Correlation** |
| --- | --- | --- |
| Census Region 1: Northeast | Lag0 (same month) | -0.443330776 |
| Census Region 1: Northeast | Lag1 (1 month) | -0.371253143 |
| Census Region 1: Northeast | Lag2 (2 months) | -0.187143741 |
| Census Region 1: Northeast | Lag3 (3 months) | 0.0134439069378531 |
| Census Region 2: Midwest | Lag0 (same month) | -0.466128075 |
| Census Region 2: Midwest | Lag1 (1 month) | -0.328838021 |
| Census Region 2: Midwest | Lag2 (2 months) | -0.126759048 |
| Census Region 2: Midwest | Lag3 (3 months) | 0.129588444186102 |
| Census Region 3: South | Lag0 (same month) | -0.547268266 |
| Census Region 3: South | Lag1 (1 month) | -0.394992044 |
| Census Region 3: South | Lag2 (2 months) | -0.182750307 |
| Census Region 3: South | Lag3 (3 months) | 0.0917219316971136 |
| Census Region 4: West | Lag0 (same month) | -0.452541847 |
| Census Region 4: West | Lag1 (1 month) | -0.319967709 |
| Census Region 4: West | Lag2 (2 months) | -0.109580737 |
| Census Region 4: West | Lag3 (3 months) | 0.128300107151049 |

**Supplementary Figure**

**
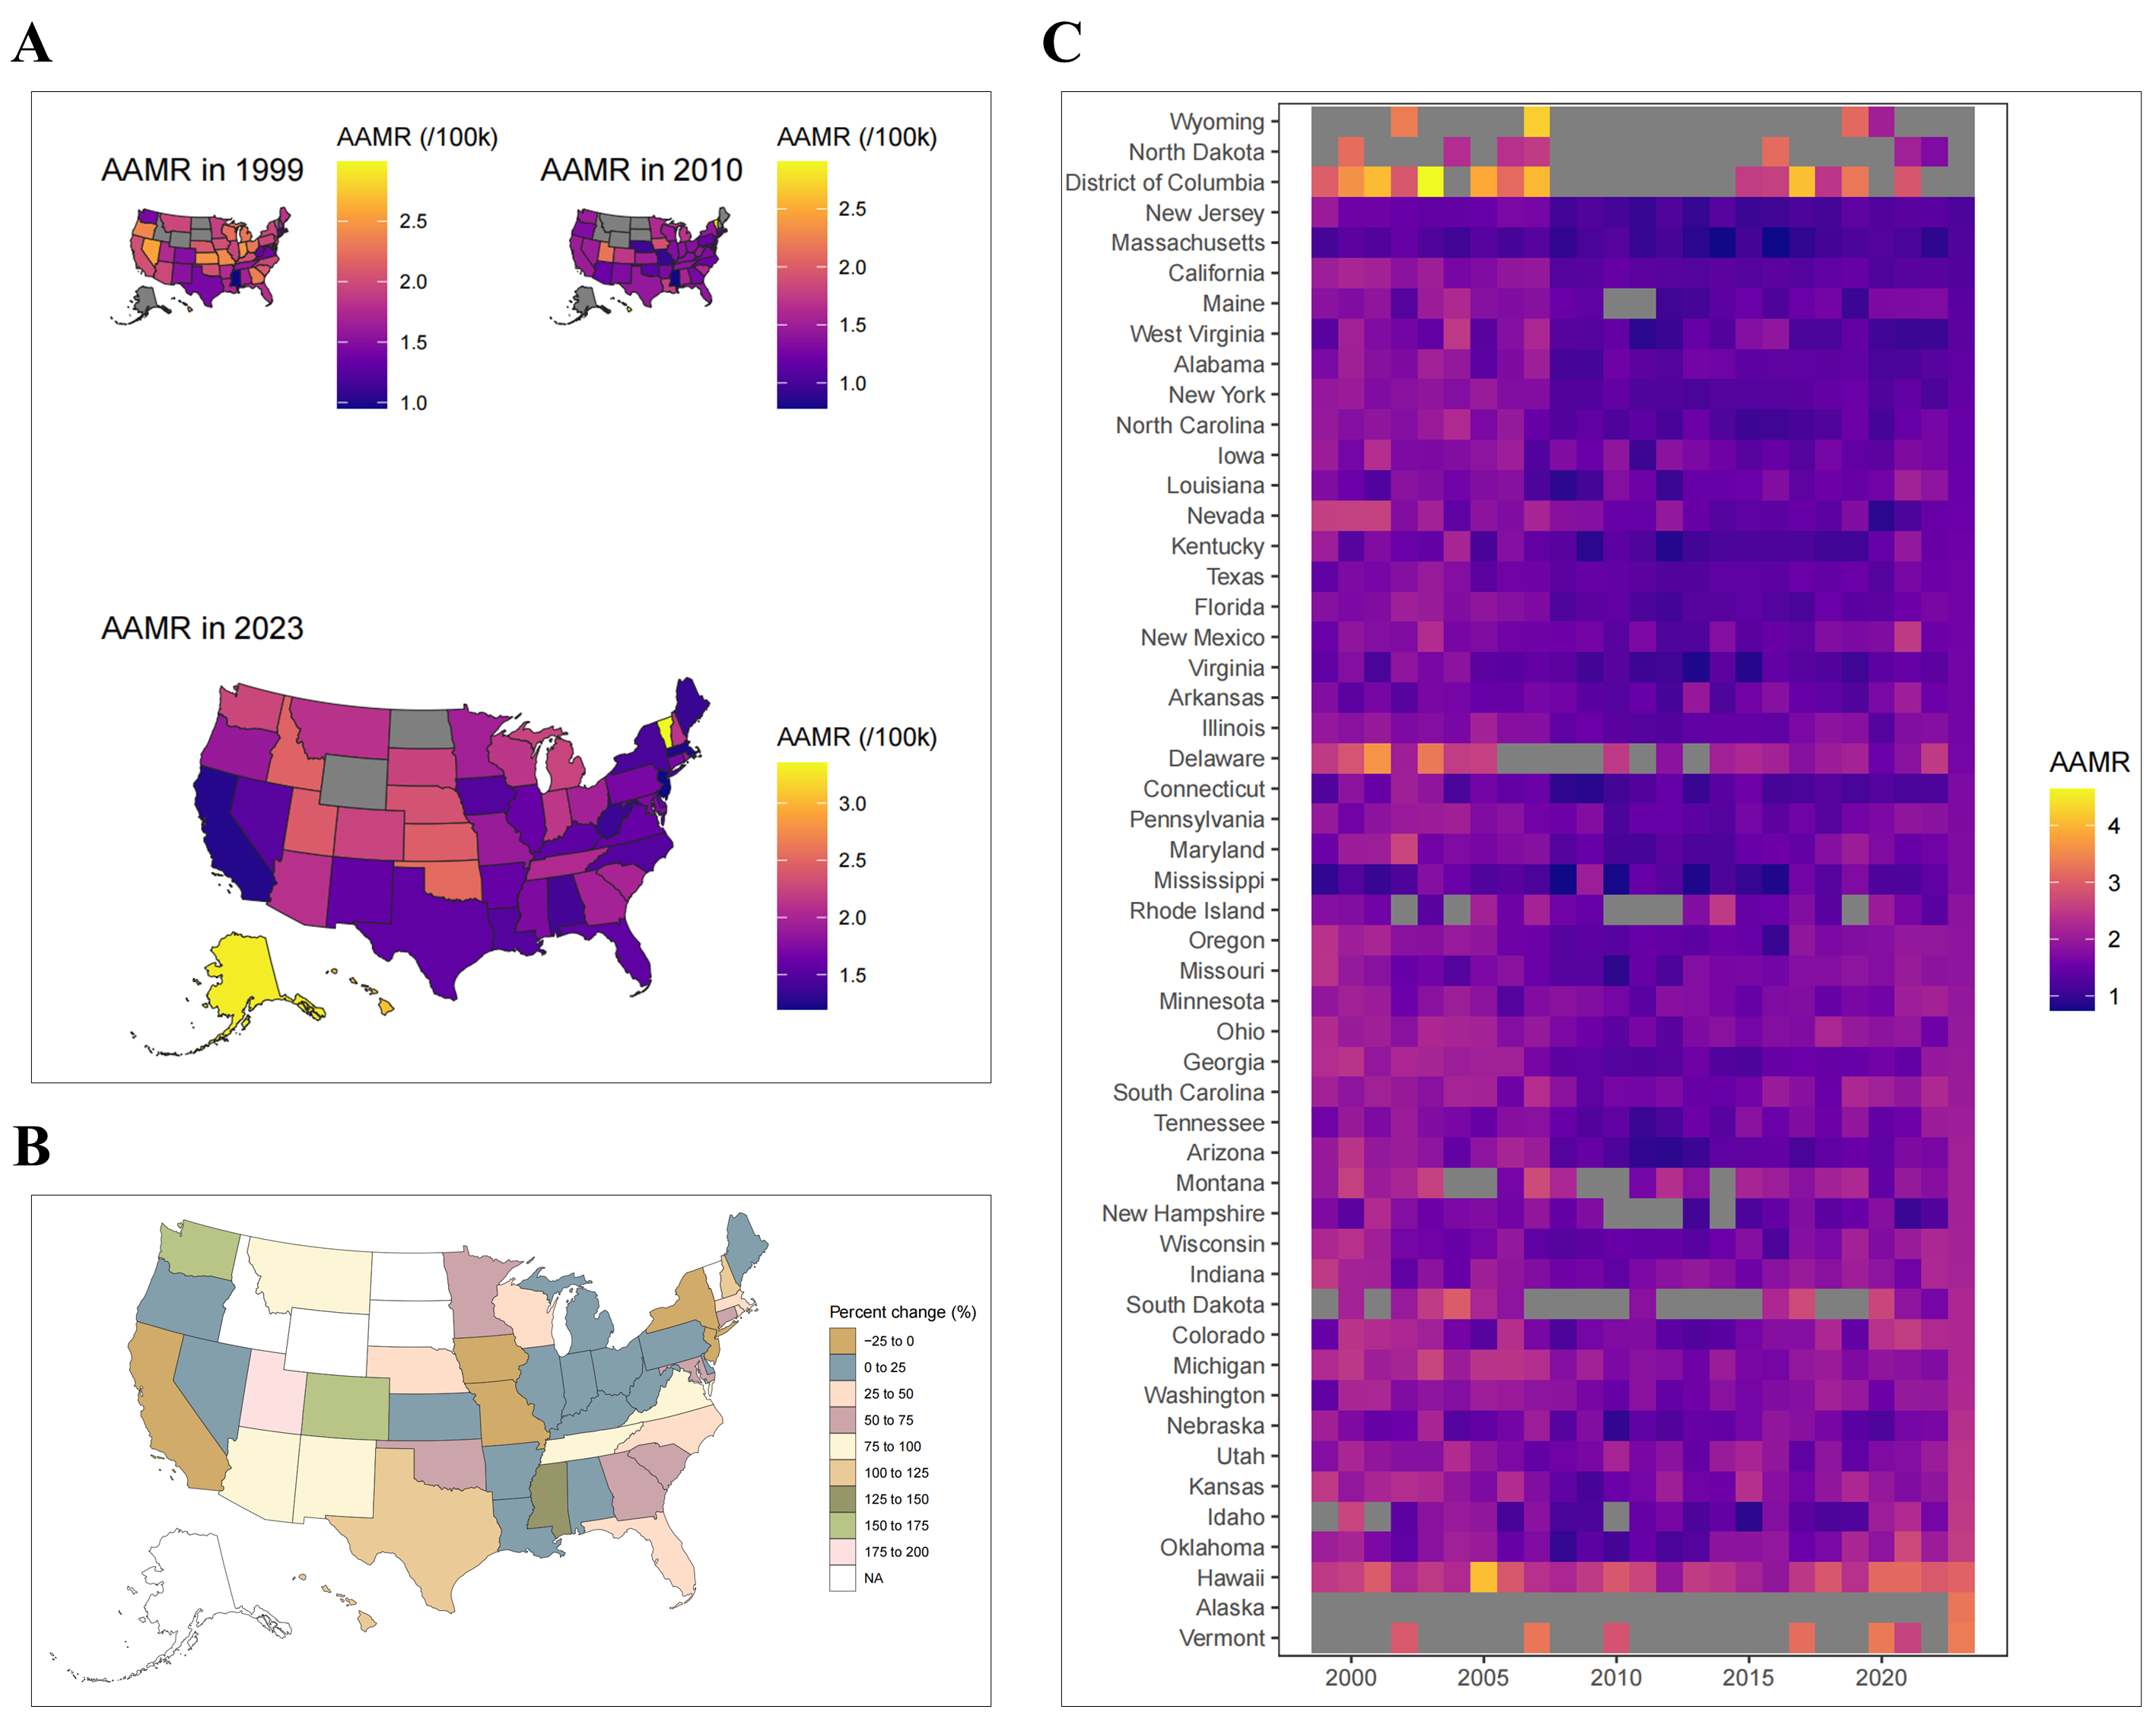
**

**Supplementary Figure S1. The United States aortic dissection (AD) mortality, 1999–2023. (A)** State-level maps of age-adjusted mortality rates (AAMR; per 100,000; directly standardised to the 2000 United States population) for 1999, 2010, and 2023. **(B)** State-level map of the percentage change in AAMR from 1999 to 2023. (C) Heatmap of state AAMRs from 1999 to 2023.


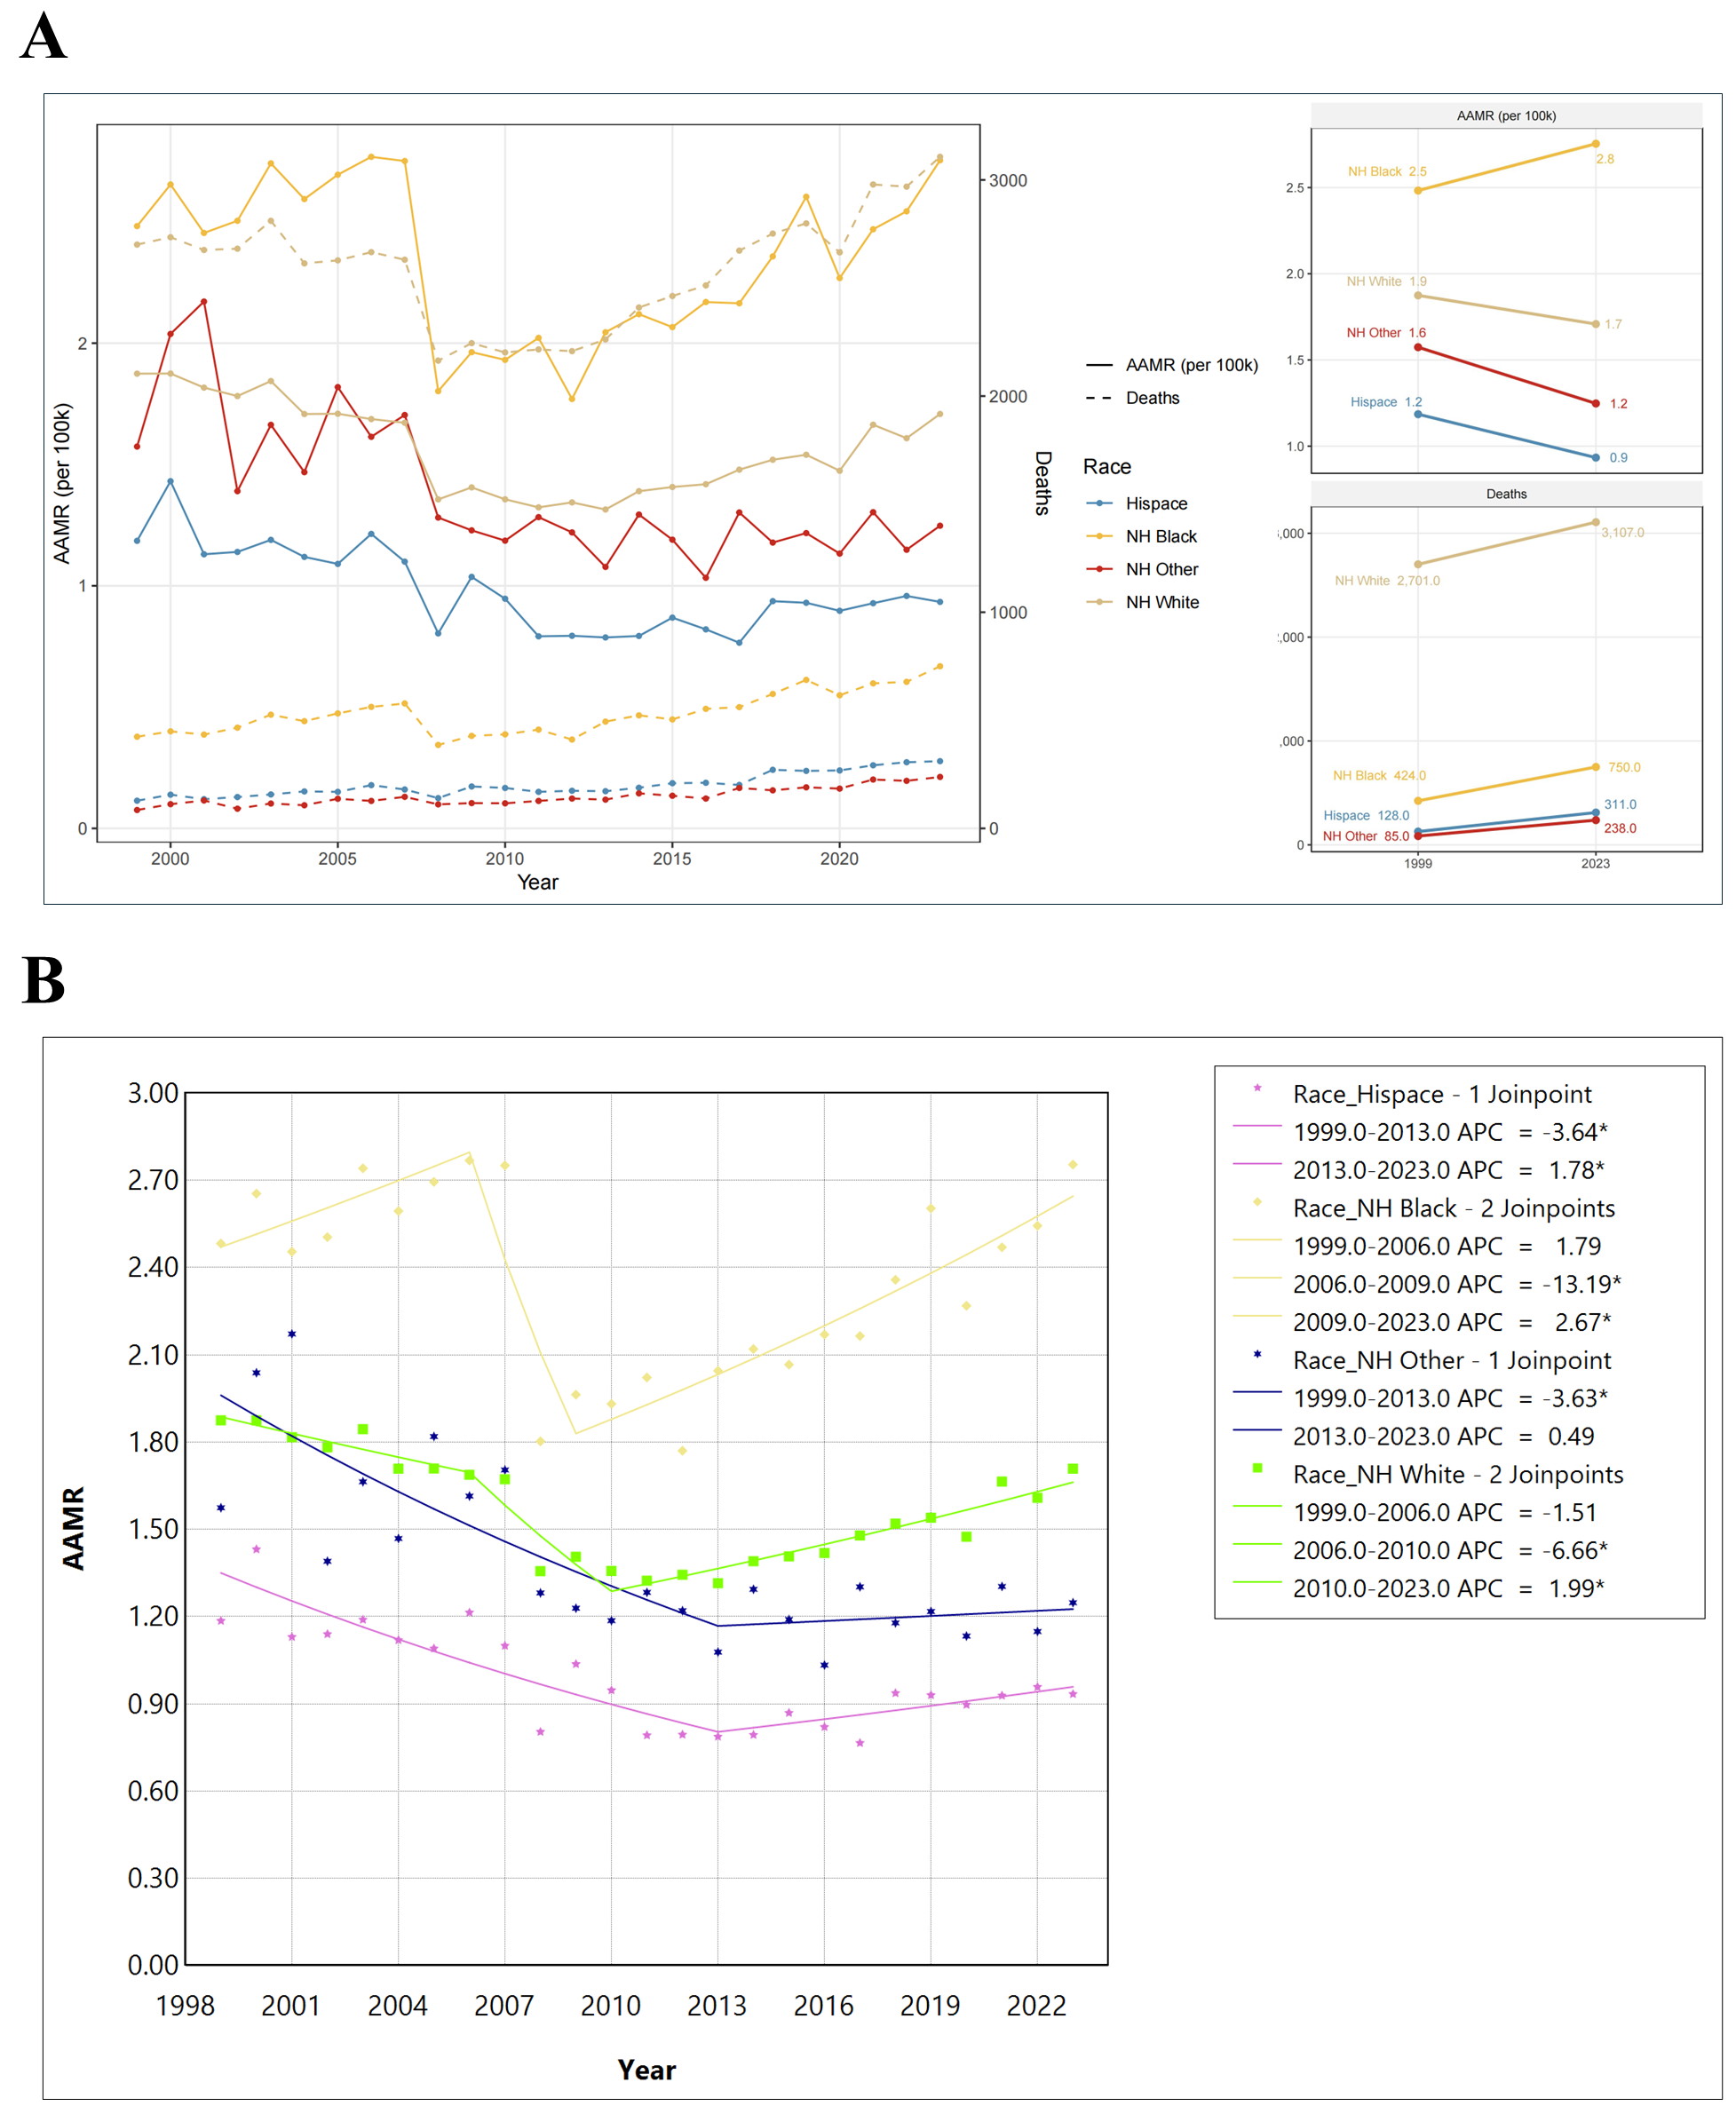


**Supplementary Figure S2. Race-specific patterns in the United States aortic dissection (AD) mortality, 1999–2023. (A)** Annual death counts and age-adjusted mortality rates (AAMR) (per 100,000; age-adjusted to the 2000 U.S. population) by race: Hispanic or Latino; non-Hispanic Black or African American (NH Black); non-Hispanic White (NH White); and non-Hispanic Other (NH Other). **(B)** Joinpoint regression of AAMRs by race/ethnicity with segment-specific annual percent change (APC) and 95% confidence intervals. *Indicates that the APC is significantly different from zero at the alpha = 0.05 level.


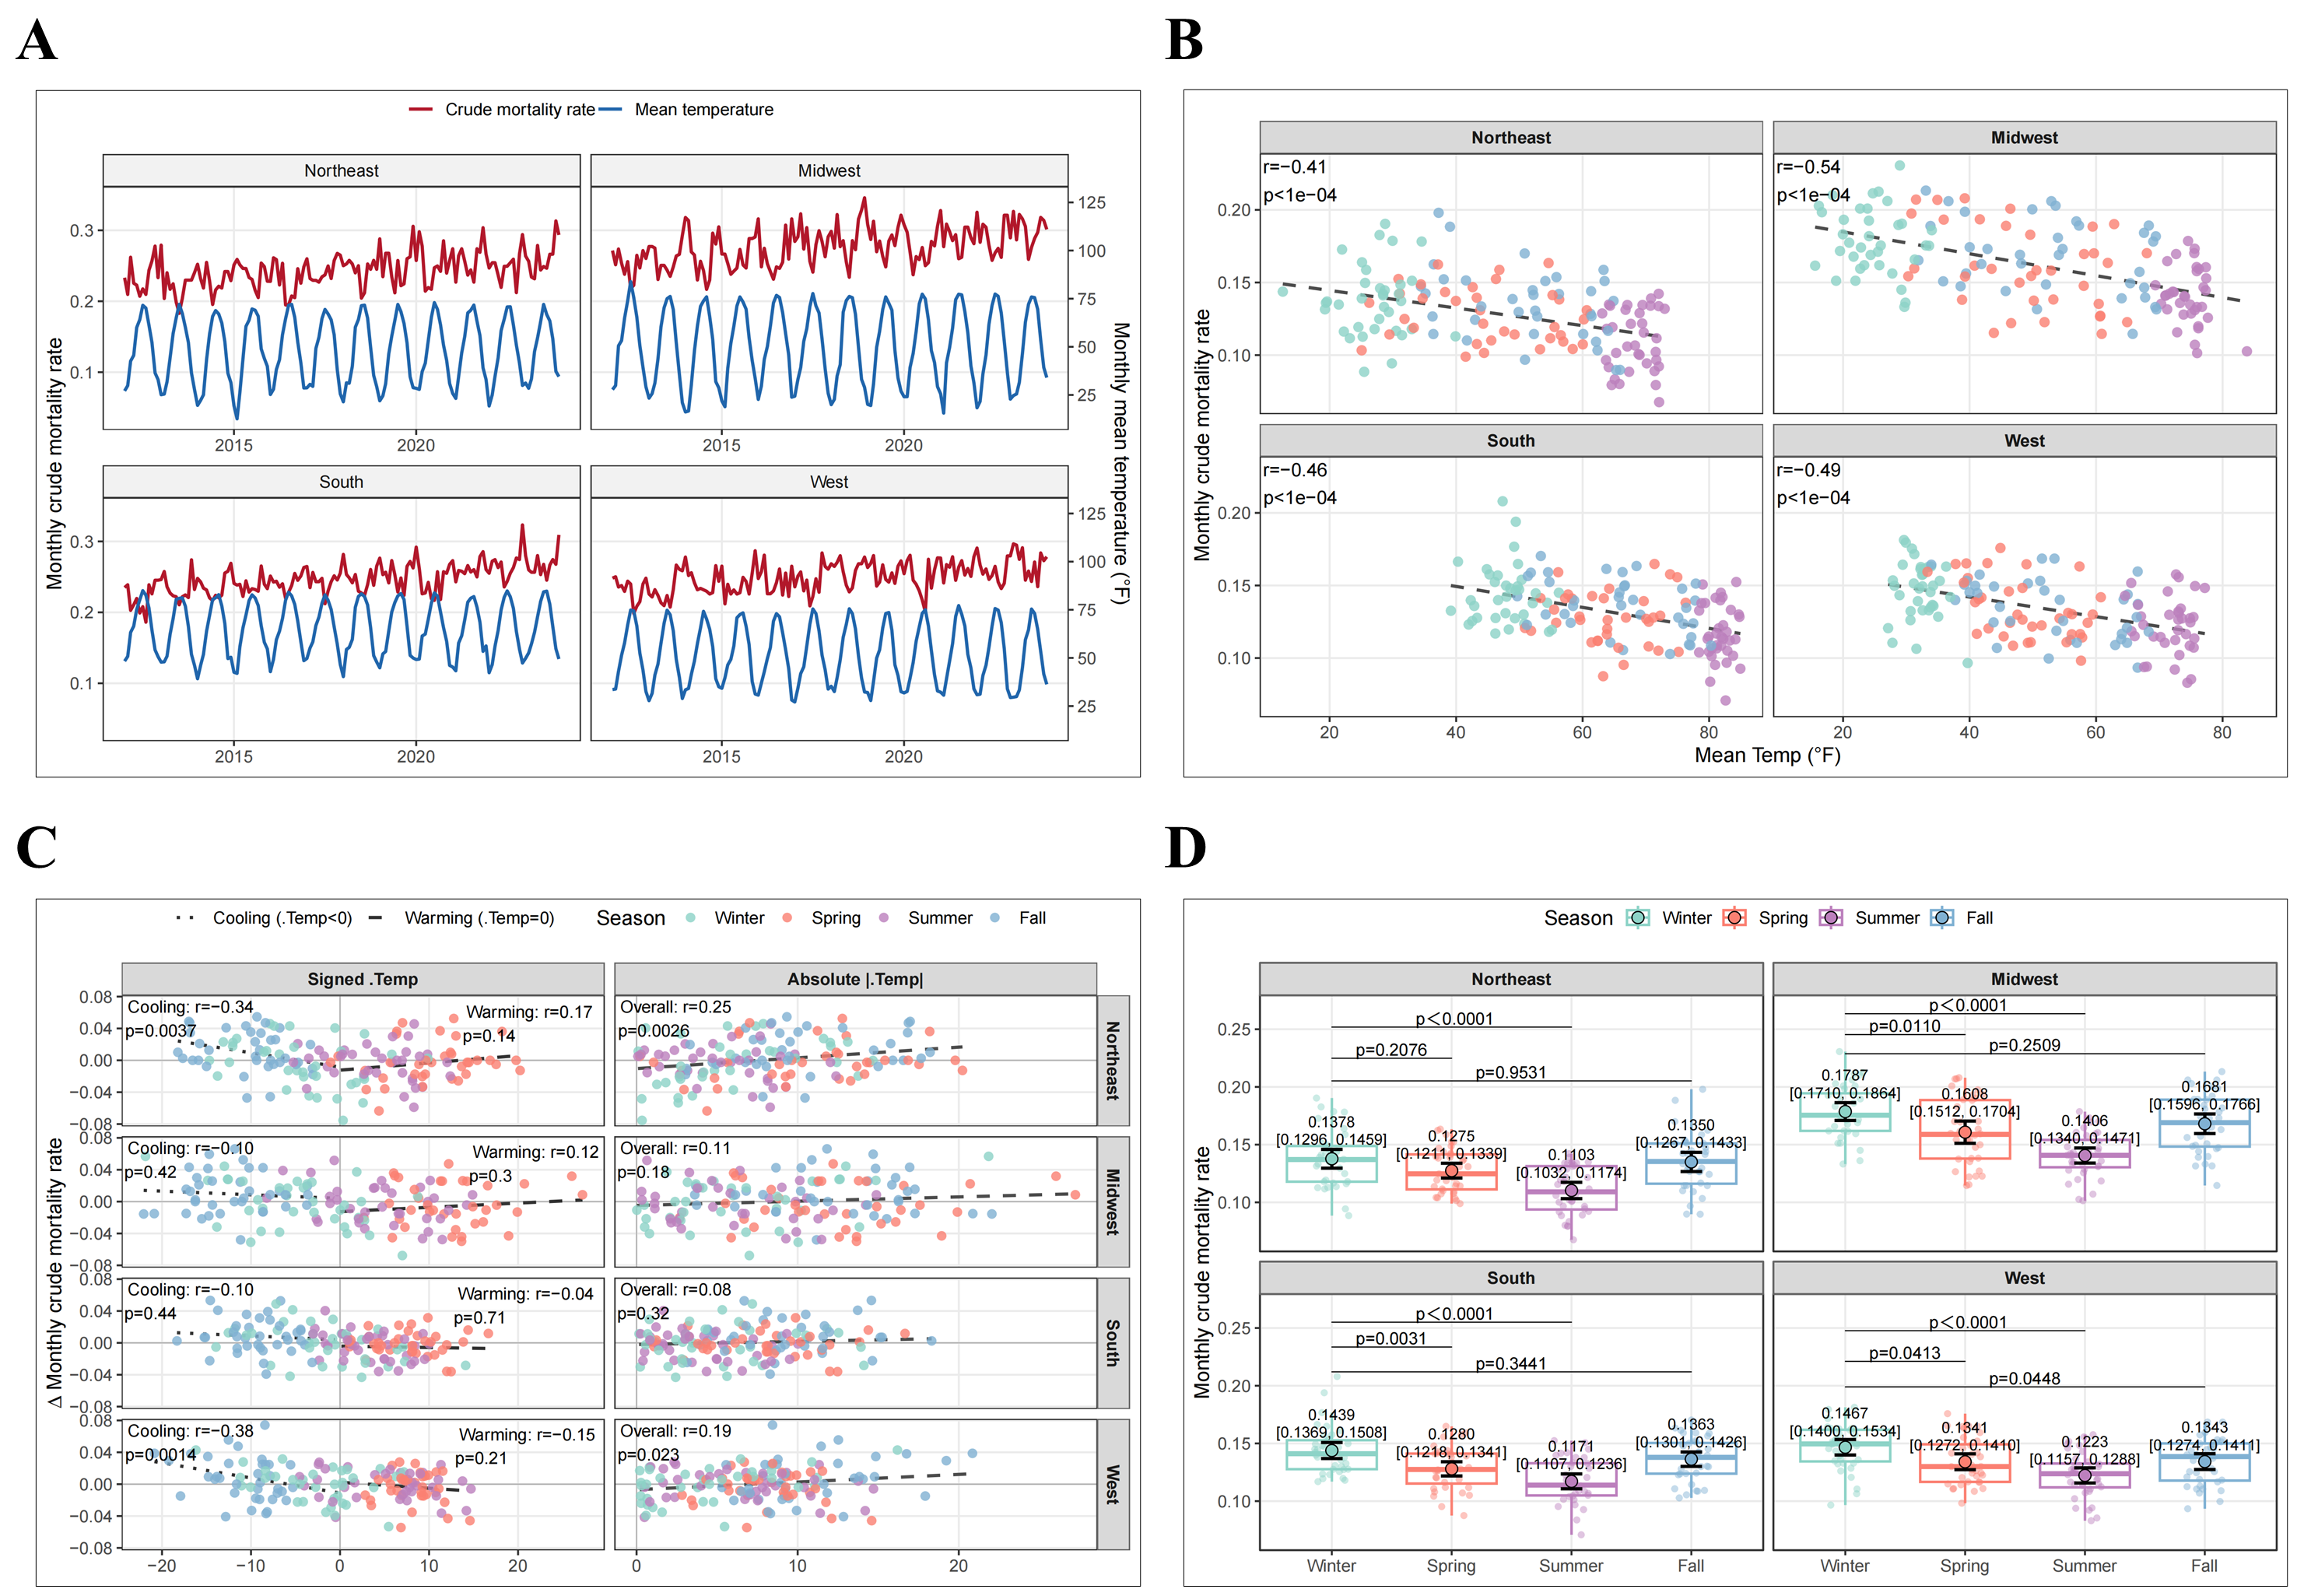


**Supplementary Figure S3.** **Correlation analysis between monthly air temperature and crude mortality from aortic dissection (AD) across the four U.S. Census regions from 2012 to 2023.** **(A)** Monthly time series of mean air temperature and monthly AD age-adjusted mortality rates (AAMR) by Census region. **(B)** Spearman correlation analysis between monthly mean air temperature and crude mortality rates. **(C)** Spearman correlation analysis between inter-monthly temperature changes (or absolute temperature differences) and corresponding inter-monthly changes in mortality rates. **(D)** Comparative analysis of differences in mean monthly mortality rates across the four seasons within each Census region.
